# Supplementary material for: Hearing Loss Among People With Schizophrenia: Implications for Clinical Practice
Source: Atypon-hosted journal article supplement (doi:10.1176/appi.ps.20220226), 2022-09-27
Supplement: appi.ps.20220226.ds001.pdf [file appi.ps.20220226.ds001.pdf]

## Sample Demographics

|                                    | Participants with<br>Schizophrenia<br>n=84 |    | Comparison<br>Participants<br>n=81 |    | p-value |
|------------------------------------|--------------------------------------------|----|------------------------------------|----|---------|
|                                    | N                                          | %  | N                                  | %  |         |
| Age (Mean $\pm$ SD)                | 38.55 $\pm$ 7.82                           |    | 37.27 $\pm$ 9.72                   |    | 0.35    |
| Sex                                |                                            |    |                                    |    | 0.41    |
| Male                               | 52                                         | 62 | 45                                 | 56 |         |
| Female                             | 32                                         | 38 | 36                                 | 44 |         |
| Racial Identification              |                                            |    |                                    |    | 0.14    |
| Asian American or Pacific Islander | 6                                          | 7  | 9                                  | 11 |         |
| Black or African American          | 47                                         | 56 | 31                                 | 38 |         |
| White or Caucasian                 | 12                                         | 14 | 17                                 | 21 |         |
| More than one race                 | 2                                          | 2  | 4                                  | 5  |         |
| Not Stated                         | 17                                         | 20 | 17                                 | 21 |         |
| Other                              |                                            |    | 3                                  | 4  |         |
| Ethnic Identification              |                                            |    |                                    |    | 0.89    |
| Hispanic/Latinx                    | 22                                         | 26 | 22                                 | 27 |         |
| Not Hispanic/Latinx                | 62                                         | 74 | 59                                 | 73 |         |

Means were compared by t tests, and proportions were compared by chi-square tests
